# Supplementary material
Source: PubMed Central journal article supplement (PMC3843241)
Supplement: NIHMS515987-supplement-supp_data.pdf [file NIHMS515987-supplement-supp_data.pdf]

Supplemental Table 1. Characteristics of Model Systems for the Study of Pathway of Cellular Senescence and Immortalization

| <i>Model System</i>                                                                                          | <i>Method</i>                                                                                  | <i>Gene(s)</i>                                                                                                                                                                                                                                                                                                                   | <i>Pathway(s)</i>                                                                    | <i>Functional Assay</i>                                                                                                                                                                                                    | <i>Study</i>                 |
|--------------------------------------------------------------------------------------------------------------|------------------------------------------------------------------------------------------------|----------------------------------------------------------------------------------------------------------------------------------------------------------------------------------------------------------------------------------------------------------------------------------------------------------------------------------|--------------------------------------------------------------------------------------|----------------------------------------------------------------------------------------------------------------------------------------------------------------------------------------------------------------------------|------------------------------|
| Human diploid fibroblast cell line from a patient with Werner Syndrome (WS8) undergoing premature senescence | Differential screening of a cDNA library                                                       | Overexpressed in senescent cells:<br><i>COL1α1 (α1(I)procollagen)</i><br><i>COL1α2 (α2(I)procollagen)</i><br><i>Ferritin heavy chain</i><br><i>Fibronectin</i><br><i>IGFBP3</i><br><i>Osteonectin</i><br><i>PAI-1</i><br><i>Thrombospondin</i><br><i>αB-crystallin</i><br>9 unknown                                              | Cell cycle<br>Cytoskeleton<br>IGF                                                    |                                                                                                                                                                                                                            | (Murano et al., 1991)        |
| Young and senescent human diploid fibroblast (HDF) cell lines, BJ and IMR90                                  | Enhanced differential display                                                                  | 7 known genes and 6 novel genes upregulated in old HDF<br><i>CD44</i><br><i>SOD</i><br><i>HEREGULIN</i><br><i>HTF (F3)</i><br><i>IFNγ</i><br><i>IGFBP5</i><br><i>PAI-2</i><br><br>5 known genes and 5 novel genes downregulated in old HDF<br><i>80K-L</i><br><i>ALDH-1</i><br><i>LAMININA</i><br><i>COL1α1</i><br><i>COL3α1</i> | Cell adhesion<br>Cell cycle<br>Cytoskeleton<br>IGF<br>MAP kinase<br>Oxidative stress |                                                                                                                                                                                                                            | (Linskens et al., 1995)      |
| Human diploid fibroblast cell line from a patient with Werner Syndrome (WS8) undergoing premature senescence | Subtractive WS cDNA library                                                                    | Overexpressed in senescent cells:<br><i>Acid sphingomyelinase</i><br><i>EF-1α</i><br><i>EIF-2β</i><br><i>Fibronectin</i><br><i>nm23-H2</i><br><i>Osteonectin</i><br>10 unknown clones                                                                                                                                            | Cell adhesion<br>Cell cycle<br>Cytoskeleton                                          |                                                                                                                                                                                                                            | (Lecka-Czernik et al., 1996) |
| Spontaneously immortalized LFS cell lines: MDAH041 and MDAH087                                               | (1) 5-aza-dC treatment<br><br>(2) Infection of cells with retrovirus encoding gene of interest | <i>p16<sup>INK4a</sup></i><br><i>p21<sup>CIP1/WAF1</sup></i>                                                                                                                                                                                                                                                                     | Cell cycle                                                                           | Senescent morphology <sup>a</sup><br>SA β-gal assay<br>Inhibits cell growth                                                                                                                                                | (Vogt et al., 1998)          |
| Primary keratinocytes                                                                                        | Overexpression of ID1                                                                          | ID1                                                                                                                                                                                                                                                                                                                              | Cell cycle                                                                           | Overexpression leads to immortalization; assessed by population doubling<br><br>ID1 overexpression results in an increase in pRB phosphorylation<br><br>ID1 elevates expression of hTERT and increases telomerase activity | (Alani et al., 1999)         |

**Pathways in Cellular Immortalization**  
AL Fridman and MA Tainsky

| <i>Model System</i>                                                                                                            | <i>Method</i>                                                                                  | <i>Gene(s)</i>                                                                                                                                                                                                                                                                                                                                                                                                               | <i>Pathway(s)</i>                           | <i>Functional Assay</i>                                                                                                                                                       | <i>Study</i>            |
|--------------------------------------------------------------------------------------------------------------------------------|------------------------------------------------------------------------------------------------|------------------------------------------------------------------------------------------------------------------------------------------------------------------------------------------------------------------------------------------------------------------------------------------------------------------------------------------------------------------------------------------------------------------------------|---------------------------------------------|-------------------------------------------------------------------------------------------------------------------------------------------------------------------------------|-------------------------|
| Human fibroblast cell line BJ, human retinal pigment cell line RPE 340, and human umbilical vein endothelial cell line (HUVEC) | cDNA microarrays of approximately 1,000 genes                                                  | Senescence gene expression profile is cell lineage dependent                                                                                                                                                                                                                                                                                                                                                                 |                                             |                                                                                                                                                                               | (Shelton et al., 1999)  |
| Id1-wt MEF<br>Id1-null MEF                                                                                                     | Growth of wt and null Id1 MEF                                                                  | ID1                                                                                                                                                                                                                                                                                                                                                                                                                          | Cell cycle                                  | Id1-null MEF exhibit premature senescence<br><br>Senescent morphology <sup>a</sup><br>SA β-gal assay                                                                          | (Alani et al., 2001)    |
| Cervical tumor cell line HeLa S3 and human embryonic lung fibroblast TIG-7                                                     | Subtractive cDNA library BrdU treated and untreated HeLa and differential colony hybridization | 26 genes and 11 ESTs with increased expression during senescence including:<br><i>Collagenase 1</i><br><i>Fibronectin</i><br><i>IGFBP3</i><br><i>IGFBP4</i><br><i>p21<sup>CIP1/WAF1</sup></i><br><i>PAI-1</i>                                                                                                                                                                                                                | Cell cycle<br>Cytoskeleton                  |                                                                                                                                                                               | (Suzuki et al., 2001)   |
| MCF-7 human breast carcinoma cell line                                                                                         | IGFBPPrP1 overexpressed                                                                        | <i>IGFBPPrP1</i>                                                                                                                                                                                                                                                                                                                                                                                                             | Cell cycle<br>IGF                           | Cell counts show expression suppresses proliferation<br>Quantitation noncycling cells by BrdUrd-Hoechst flow cytometry<br>SA β-gal assay<br>Senescent morphology <sup>a</sup> | (Wilson et al., 2002)   |
| Effects of 5-aza-dC on human fibroblast cell line, LD419 and human bladder tumor cell line, T24                                | Affymetrix oligonucleotide microarray containing 6,600 genes                                   | A cutoff fold change of > or < 4-fold was used to identification of genes up- and downregulated following 8 days 5-aza-dC treatment<br><br>LD419 cells<br>34 genes upregulated (10 inducible by IFN) including <i>STAT1</i><br><br>11 genes downregulated<br><br>T24 cells<br>61 genes upregulated (33 inducible by IFN) including <i>IRF7</i> , <i>PAI-2</i> , <i>STAT1</i> and <i>TNFAIP3</i><br><br>2 genes downregulated | Cell cycle<br>IFN pathway<br>Tumor antigens |                                                                                                                                                                               | (Liang et al., 2002)    |
| Human prostate epithelial cells (HPECs) passage to senescence and HPV16 E7 immortalized HPECs                                  | cDNA microarray about 20,000 unique genes and ESTs                                             | Genes that were upregulated in senescence and downregulated in immortalization:<br><i>IGFBP3</i><br><i>BRAK</i><br><i>DOC1</i><br><br>93 genes (51 known function) upregulated in senescence                                                                                                                                                                                                                                 | Cytokine<br>Cytoskeleton                    |                                                                                                                                                                               | (Schwarze et al., 2002) |

| <i>Model System</i>                                                                  | <i>Method</i>                                                     | <i>Gene(s)</i>                                                                                                                                                                                                                                                                                                                     | <i>Pathway(s)</i>                                                                                                                                                                          | <i>Functional Assay</i>                                                                                                | <i>Study</i>               |
|--------------------------------------------------------------------------------------|-------------------------------------------------------------------|------------------------------------------------------------------------------------------------------------------------------------------------------------------------------------------------------------------------------------------------------------------------------------------------------------------------------------|--------------------------------------------------------------------------------------------------------------------------------------------------------------------------------------------|------------------------------------------------------------------------------------------------------------------------|----------------------------|
|                                                                                      |                                                                   | including:<br><i>IGFBP2</i><br><i>Fibronectin</i><br><i>MDM2</i><br><i>RhoB</i><br><i>p16<sup>INK4a</sup></i><br><i>p21<sup>CIP1/WAF1</sup></i>                                                                                                                                                                                    | Differentiation<br>ECM<br>Growth<br>regulator/tumor<br>association<br>IGF<br>Motility/migration<br>Stress/injury/xenobiotic<br>Transcription                                               |                                                                                                                        |                            |
|                                                                                      |                                                                   | 159 genes (77 known function)<br>downregulated in senescence                                                                                                                                                                                                                                                                       |                                                                                                                                                                                            |                                                                                                                        |                            |
|                                                                                      |                                                                   | 137 genes (70 known function)<br>downregulated in immortalization<br>including:<br><i>AhR</i><br><i>IGFBP5</i><br><i>IGFBP<sup>r</sup>P2 (CTGF)</i><br><i>Osteonectin</i>                                                                                                                                                          | Cell adhesion<br>Cell cycle<br>Cytoskeleton<br>ECM<br>IGF<br>Signaling/growth/<br>cytokine<br>Calcium regulation<br>Stress/xenobiotic                                                      |                                                                                                                        |                            |
|                                                                                      |                                                                   | 92 genes (40 known function)<br>upregulated in immortalization                                                                                                                                                                                                                                                                     |                                                                                                                                                                                            |                                                                                                                        |                            |
| Spontaneous and chemically immortalized human fibroblast and keratinocyte cell lines | Analysis mRNA, and protein expression, and CpG island methylation | Association of genes with immortalization<br><br><i>p16<sup>INK4a</sup></i><br><i>pRB</i>                                                                                                                                                                                                                                          | Cell cycle                                                                                                                                                                                 | <i>p16<sup>INK4a</sup></i> : little to no expression at mRNA or protein level.<br><br><i>pRB</i> : hyperphosphorylated | (Tsutsui et al., 2002)     |
| Immortalized cell lines telomere length was maintained by ALT or telomerase          |                                                                   |                                                                                                                                                                                                                                                                                                                                    |                                                                                                                                                                                            |                                                                                                                        |                            |
| Prostate epithelial cells                                                            | SAGE, SAGE tags represented 25,645 unique mRNA species            | A cutoff of $P < 0.05$ and fold changed $> 2.5$ was used for identification of up- and downregulated genes<br><br>157 mRNAs (70 known genes) upregulated during senescence including:<br><i>Cyclin D1</i><br><i>Fibronectin</i><br><i>Gelsolin</i><br><i>PAI-1</i><br><i>RAC1</i><br><i>Vimentin</i><br>4 <i>IFN related genes</i> | Actin fragmentation<br>Cell adhesion<br>Cell cycle<br>ECM remodeling<br>IFN<br>Intermediate filament<br>Lamellipodia formation<br><br>G <sub>2</sub> -M regulation<br>Transcription factor |                                                                                                                        | (Untergasser et al., 2002) |
|                                                                                      |                                                                   | 116 mRNAs (65 known genes) repressed during senescence including:<br><i>CKS1</i><br><i>Cyclin B1</i><br><i>E2F4</i><br><i>EGR1</i><br><i>ID1</i>                                                                                                                                                                                   |                                                                                                                                                                                            |                                                                                                                        |                            |

| <i>Model System</i>                                                                                                                                   | <i>Method</i>                                                                                                                                                                                   | <i>Gene(s)</i>                                                                                                                                                                                                                                                                                                                                   | <i>Pathway(s)</i>                                                                     | <i>Functional Assay</i>                                                                                | <i>Study</i>           |
|-------------------------------------------------------------------------------------------------------------------------------------------------------|-------------------------------------------------------------------------------------------------------------------------------------------------------------------------------------------------|--------------------------------------------------------------------------------------------------------------------------------------------------------------------------------------------------------------------------------------------------------------------------------------------------------------------------------------------------|---------------------------------------------------------------------------------------|--------------------------------------------------------------------------------------------------------|------------------------|
| Rapidly proliferating (PD12) and senescent (PD19) normal human oral keratinocytes                                                                     | Human ExpressChip HO1, HO2 and HO3, representing 3,195 annotated genes                                                                                                                          | Approximately 5% of the 3195 screened genes were upregulated 3 to 500-fold in senescent cells including:<br><i>p16<sup>INK4a</sup></i><br><i>p15<sup>INK4b</sup></i><br><i>p19<sup>INK4d</sup></i><br><i>p57</i><br><i>CYP1B1</i><br><i>COL1<math>\alpha</math>1</i><br><i>Fibronectin</i><br><i>IGFBP3</i><br><i>IGFBP<sup>r</sup>P2 (CTGF)</i> | Cell cyclin dependent kinase inhibitors<br>Apolipids<br>ECM<br>Mitochondrial proteins |                                                                                                        | (Kang et al., 2003)    |
| Pre-crisis, spontaneously immortalized and 5-aza-dC treated immortalized LFS cell line: MDAH041                                                       | Affymetrix HGU95Av2 oligonucleotide microarray<br>Spontaneously immortalized MDAH041 LFS fibroblasts were compared to pre-crisis LFS fibroblasts and to 5-aza-dC treated immortalized LFS cells | Expression of 85 genes decreased during immortalization and increased following 5-aza-dC treatment<br><br>39 of the 85 genes were IFN pathway regulated genes                                                                                                                                                                                    | IFN                                                                                   |                                                                                                        | (Kulaeva et al., 2003) |
| Murine bone marrow                                                                                                                                    | Dimerized form of MLL                                                                                                                                                                           | MLL                                                                                                                                                                                                                                                                                                                                              | Apoptosis<br>Cell cycle<br>Transcription                                              | Growth<br>Morphology<br>Cell cycle analysis                                                            | (Martin et al., 2003)  |
| HeLa cells infected with empty adenovirus vector or E2 containing adenovirus vector (in order to induce senescence)                                   | Affymetrix HGU95Av2 oligonucleotide microarray                                                                                                                                                  | Genes upregulated senescence<br><i>p21<sup>CIP1/WAF1</sup></i><br><i>p57</i><br><i>p130</i><br><i>Cyclin G2</i><br><i>RAB2L</i><br><i>RAB5B</i><br><i>RAB13</i><br><i>RAB31</i><br><i>RAB1F</i><br><i>RABGGTA</i>                                                                                                                                | G1/S Arrest<br>Vesicular transport                                                    |                                                                                                        | (Wells et al., 2003)   |
| Human prostate epithelial cancer cell lines DU-145 (nonfunctional pRB and p53), PC-3 (functional pRB, mutant p53), and LNCaP (functional pRB and p53) | Overexpression of IFI 16B in DU-145, PC-3 and LNCaP                                                                                                                                             | IFI 16                                                                                                                                                                                                                                                                                                                                           | IFN                                                                                   | Overexpression inhibits colony formation<br>Senescent morphology <sup>a</sup><br>SA $\beta$ -gal assay | (Xin et al., 2003)     |
| Human primary fibroblast cell lines: WS1, WI38, BJ<br>Human mammary epithelial cell lines: 48R and 184                                                | cDNA microarrays of 31,000 genes were used to compare senescent, quiescent and early passage proliferating cells                                                                                | Select genes upregulated during HMEC M1 senescence<br><i>CITED2</i><br><i>GUK1</i><br><i>HTATIP2</i>                                                                                                                                                                                                                                             | Apoptosis<br>Cell cycle<br>IFN<br>IGF<br>Transport                                    |                                                                                                        | (Zhang et al., 2003)   |

| <i>Model System</i>                                                                                                               | <i>Method</i>                                                                                                                                                                               | <i>Gene(s)</i>                                                                                                                                                                                                                                                                                                                              | <i>Pathway(s)</i>                                                                                                      | <i>Functional Assay</i>                                                                           | <i>Study</i>           |
|-----------------------------------------------------------------------------------------------------------------------------------|---------------------------------------------------------------------------------------------------------------------------------------------------------------------------------------------|---------------------------------------------------------------------------------------------------------------------------------------------------------------------------------------------------------------------------------------------------------------------------------------------------------------------------------------------|------------------------------------------------------------------------------------------------------------------------|---------------------------------------------------------------------------------------------------|------------------------|
|                                                                                                                                   |                                                                                                                                                                                             | <i>IGFBP2</i><br><i>IGFBP<math>\alpha</math>P1</i><br><i>ISG15</i><br><i>IGSF3</i><br><i>RRAS</i><br><i>STAT1</i><br><i>TFAP2A</i><br><i>TNFAIP3</i>                                                                                                                                                                                        | Transcription                                                                                                          |                                                                                                   |                        |
|                                                                                                                                   |                                                                                                                                                                                             | Select genes upregulated during fibroblast senescence<br><i>CITED2</i><br><i>GUK1</i><br><i>IGFBP<math>\alpha</math>P1</i><br><i>PEA15</i><br><i>RRAS</i><br><i>S100A11</i><br><i>SERPINB2</i>                                                                                                                                              |                                                                                                                        |                                                                                                   |                        |
| Human diploid fibroblast cell lines WI-38 and BJ                                                                                  | Overexpression of IFI 16<br><br>Knockdown of IFI 16 with si-RNA                                                                                                                             | IFI 16                                                                                                                                                                                                                                                                                                                                      | IFN                                                                                                                    | Overexpression inhibits colony formation<br><br>Knockdown extends lifespan; SA $\beta$ -gal assay | (Xin et al., 2004)     |
| Human dermal fibroblasts (HDF), young compared to old/senescent                                                                   | Genetrack® Human cDNA 17K microarray                                                                                                                                                        | 43 upregulated in old HDF including:<br><i>Cyclin D1</i><br><i>IGFBP3</i><br><i>IGFBP5</i><br><i>10 IFN genes</i><br><i>8 inflammation genes</i>                                                                                                                                                                                            | Cell adhesion<br>Cell cycle<br>Cytoskeleton<br>Cell adhesion<br>Cell proliferation<br>Inflammatory genes<br>Metabolism |                                                                                                   | (Yoon et al., 2004)    |
|                                                                                                                                   |                                                                                                                                                                                             | 42 downregulated in old HDF                                                                                                                                                                                                                                                                                                                 |                                                                                                                        |                                                                                                   |                        |
| Precrisis, spontaneously immortalized and 5-aza-dC treated immortalized LFS cell lines: MDAH041, MDAH087-N, MDAH087-1, MDAH087-10 | Affymetrix HGU95Av2 oligonucleotide microarray Spontaneously immortalized MDAH041 LFS fibroblasts were compared to precrisis LFS fibroblasts and to 5-aza-dC treated immortalized LFS cells | 14 epigenetically regulated genes in common to all four LFS cell lines:<br><i>ALDH1A3</i><br><i>CLTB</i><br><i>CREG</i><br><i>CYP1B1</i><br><i>FLJ14675</i><br><i>HPS5</i><br><i>HSPA2</i><br><i>HTATIP2</i><br><i>IGFBP<math>\alpha</math>P1</i><br><i>KIAA1750</i><br><i>MAP1LC3B</i><br><i>OPTN</i><br><i>SERPINB2</i><br><i>TNFAIP2</i> | IFN<br>Cell cycle Cytoskeleton                                                                                         |                                                                                                   | (Fridman et al., 2006) |

**Pathways in Cellular Immortalization**  
AL Fridman and MA Tainsky

| <i>Model System</i>                                                                                                                | <i>Method</i>                                                                                                | <i>Gene(s)</i>                                                                            | <i>Pathway(s)</i>                                                                 | <i>Functional Assay</i>                                                                                                                                                                                                                                                                                                                                                                                                                                                                                                                                                                                                                                              | <i>Study</i>             |
|------------------------------------------------------------------------------------------------------------------------------------|--------------------------------------------------------------------------------------------------------------|-------------------------------------------------------------------------------------------|-----------------------------------------------------------------------------------|----------------------------------------------------------------------------------------------------------------------------------------------------------------------------------------------------------------------------------------------------------------------------------------------------------------------------------------------------------------------------------------------------------------------------------------------------------------------------------------------------------------------------------------------------------------------------------------------------------------------------------------------------------------------|--------------------------|
| Mouse embryonic fibroblasts and primary human BJ fibroblasts                                                                       | Suppression of PAI-1 by RNAi<br><br>Overexpression of PAI-1                                                  | <i>PAI-1</i>                                                                              | ECM remodeling<br>Blood coagulation<br>Fibrinolysis<br>Regulation of angiogenesis | Suppression by RNAi results in escape from replicative senescence; assessed by SA $\beta$ -gal assay, colony formation assay, population doubling<br><br>Overexpression results in induction of replicative senescence; assessed by SA $\beta$ -gal assay, colony formation assay                                                                                                                                                                                                                                                                                                                                                                                    | (Kortlever et al., 2006) |
| Human umbilical vein endothelial cells (HUVEC)                                                                                     | Overexpression of IGFBP5 in HUVEC<br><br>Exogenous treatment of HUVEC with IGFBP5<br><br>Knockdown of IGFBP5 | <i>IGFBP5</i>                                                                             | IGF                                                                               | Overexpression or exogenous treatment of HUVEC cells with IGFBP5 results in induction of replicative senescence; assessed by SA $\beta$ -gal assay, morphology <sup>a</sup> , MTT cell proliferation assay and flow cytometry; increase in p53, p16 <sup>INK4a</sup> and p21 <sup>CIP1/WAF1</sup> protein expression, and decreased pRB phosphorylation<br><br>Knockdown of IGFBP5 in old senescent HUVEC cells results in a reduction of the senescence phenotype; assessed by SA $\beta$ -gal assay, morphology <sup>a</sup> and MTT cell proliferation assay; reduction in p53 and p21 <sup>CIP1/WAF1</sup> protein expression, and increased pRB phosphorylation | (Seok Kim et al., 2007)  |
| Primary breast tumor cultures pre- and post-hTERT transduction, and spontaneously immortalized breast cell lines                   | 42,000 feature cDNA microarrays                                                                              | In hTERT transduced (tumors there were 427 genes upregulated and 170 genes downregulated) | Cell cycle<br>Cytoskeleton<br>Oxidative stress pathway                            |                                                                                                                                                                                                                                                                                                                                                                                                                                                                                                                                                                                                                                                                      | (Dairkee et al., 2007)   |
| Pre-crisis, spontaneously immortalized and 5-aza-dC treated immortalized LFS cell lines: MDAH041, MDAH087-N, MDAH087-1, MDAH087-10 | MDAH041 and MDAH087-1 were transfected with <i>IGFBP3</i> and <i>IGFBP1</i>                                  | <i>IGFBP3</i><br><i>IGFBP1</i>                                                            | Cell cycle<br>IGF<br>IFN                                                          | Inhibits cell growth and colony formation                                                                                                                                                                                                                                                                                                                                                                                                                                                                                                                                                                                                                            | (Fridman et al., 2007)   |
| Pre-stasis (finite life span), post-stasis (p16 silenced) and immortalized human mammary epithelial cells                          | Affymetrix U133A/B oligonucleotide microarray                                                                |                                                                                           | Angiogenesis ECM<br>Cell-cell interactions<br>Actin cytoskeleton<br>Cell cycle    |                                                                                                                                                                                                                                                                                                                                                                                                                                                                                                                                                                                                                                                                      | (Li et al., 2007)        |
| Pre-crisis, spontaneously immortalized and 5-aza-dC treated immortalized LFS cell lines: MDAH041, MDAH087-N, MDAH087-1, MDAH087-10 | MDAH041 and MDAH087-1 were transfected with <i>IRF5</i> and <i>IRF7</i>                                      | <i>IRF5</i><br><i>IRF7</i>                                                                | IFN                                                                               | SA $\beta$ -gal assay<br>Cell proliferation and life span assays show expression inhibits cell growth                                                                                                                                                                                                                                                                                                                                                                                                                                                                                                                                                                | (Li et al., 2008)        |

Abbreviations: IFN, interferon; IGF, insulin growth factor; MEF, mouse embryonic fibroblast; ND, Not determined

<sup>a</sup>Senescent morphology: enlarged cells with a flat morphology

Supplemental Table 2. Senescence and immortalization related genes

| Gene               | GeneID <sup>d</sup> | Chromosome <sup>b</sup> | Expression      |                    | Functional Studies  |                                    | Association with one of the six key senescence/immortalization pathways <sup>c</sup> | References                                                                             |
|--------------------|---------------------|-------------------------|-----------------|--------------------|---------------------|------------------------------------|--------------------------------------------------------------------------------------|----------------------------------------------------------------------------------------|
|                    |                     |                         | Senescent cells | Immortalized cells | Suppression of gene | Ectopic overexpression of the gene |                                                                                      |                                                                                        |
| <i>AhR</i>         | 196                 | 7p15                    |                 | ↓                  |                     |                                    | Cell cycle                                                                           | (Schwarze et al., 2002)                                                                |
| <i>ALDH1</i>       | 216                 | 9q21.13                 | ↓               |                    |                     |                                    |                                                                                      | (Linskens et al., 1995)                                                                |
| <i>ALDH1A3</i>     | 220                 | 15q26.3                 | ↑               | ↓                  |                     |                                    | Regulated by p53<br>IFN<br>Oxidoreductase activity                                   | (Fridman et al., 2006)                                                                 |
| <i>Bmi-1</i>       | 648                 | 10p11.23                | ↓               |                    |                     | Immortalization                    | Cell cycle                                                                           | (Itahana et al., 2003)                                                                 |
| <i>BRAK</i>        | 9547                | 5q31                    | ↑               | ↓                  |                     | Suppresses tumor growth            | Immune response; chemokine                                                           | (Ozawa et al., 2006; Schwarze et al., 2002)                                            |
| <i>CD44</i>        | 960                 | 11p13                   | ↑               |                    |                     |                                    | Cell adhesion                                                                        | (Linskens et al., 1995)                                                                |
| <i>CDC25B</i>      | 994                 | 20p13                   | ↓               | ↑                  |                     |                                    | Cell cycle                                                                           | (Fridman et al., 2006; Li et al., 2007)                                                |
| <i>CITED2</i>      | 10370               | 6q23.3                  | ↑               |                    |                     |                                    | Cell cycle                                                                           | (Zhang et al., 2003)                                                                   |
| <i>CKS-1</i>       | 137529              | 8q21.13                 | ↓               |                    |                     |                                    | Cell cycle                                                                           | (Untergasser et al., 2002)                                                             |
| <i>CLTB</i>        | 1212                | 5q35                    | ↑               | ↓                  |                     |                                    |                                                                                      | (Fridman et al., 2006)                                                                 |
| <i>COL1α1</i>      | 1277                | 17q21.33                | ↑↓ <sup>d</sup> |                    |                     |                                    | Focal adhesion                                                                       | (Kang et al., 2003; Linskens et al., 1995; Murano et al., 1991)                        |
| <i>COL1α2</i>      | 1278                | 7q22.1                  | ↑               |                    |                     |                                    | Focal adhesion                                                                       | (Murano et al., 1991)                                                                  |
| <i>COL3α1</i>      | 1281                | 2q31                    | ↓               |                    |                     |                                    | Focal adhesion                                                                       | (Linskens et al., 1995)                                                                |
| <i>CREG</i>        | 8804                | 1q24                    | ↑               | ↓                  |                     | Inhibits growth                    | Cell cycle                                                                           | (Di Bacco & Gill, 2003; Fridman et al., 2006)                                          |
| <i>Cyclin B1</i>   | 891                 | 5q12                    | ↓               |                    |                     |                                    | Cell cycle                                                                           | (Untergasser et al., 2002)                                                             |
| <i>Cyclin D1</i>   | 595                 | 11q13                   | ↑               |                    |                     |                                    | Cell cycle                                                                           | (Chang et al., 2002; Untergasser et al., 2002; Yoon et al., 2004)                      |
| <i>CYP1B1</i>      | 1545                | 2p21                    | ↑               | ↓                  |                     |                                    |                                                                                      | (Fridman et al., 2006; Kang et al., 2003; Kulaeva et al., 2003)                        |
| <i>DOC1</i>        | 11259               | 3q21.1                  | ↑               | ↓                  |                     |                                    | Cytoskeleton                                                                         | (Kulaeva et al., 2003; Schwarze et al., 2002; Tandle et al., 2005; Zhang et al., 2003) |
| <i>E2F4</i>        | 1874                | 16q21-16q22             | ↓               |                    |                     |                                    | Cell cycle                                                                           | (Untergasser et al., 2002)                                                             |
| <i>EF-1α</i>       | 10767               | 6q23-6q24               | ↑               |                    |                     |                                    |                                                                                      | (Lecka-Czernik et al., 1996)                                                           |
| <i>EGR1</i>        | 1958                | 5q31.1                  | ↓               |                    |                     |                                    | Binds p53                                                                            | (Untergasser et al., 2002)                                                             |
| <i>EIF-2β</i>      | 8894                | 20pter-20q12            | ↑               |                    |                     |                                    |                                                                                      | (Lecka-Czernik et al., 1996)                                                           |
| <i>Fibronectin</i> | 2335                | 2q34                    | ↑               |                    |                     |                                    | Cytoskeleton                                                                         | (Kang et al., 2003; Lecka-Czernik et al., 1996; Murano et al., 1991; Schwarze et al.,  |

**Pathways in Cellular Immortalization**  
AL Fridman and MA Tainsky

| <i>Gene</i>                | <i>GeneID</i> <sup>a</sup> | <i>Chromosome</i> <sup>b</sup> | <i>Expression</i>      |                           | <i>Functional Studies</i>             |                                                 | <i>Association with one of the six key senescence/immortalization pathways</i> <sup>c</sup> | <i>References</i>                                                                                                                                                                            |
|----------------------------|----------------------------|--------------------------------|------------------------|---------------------------|---------------------------------------|-------------------------------------------------|---------------------------------------------------------------------------------------------|----------------------------------------------------------------------------------------------------------------------------------------------------------------------------------------------|
|                            |                            |                                | <i>Senescent cells</i> | <i>Immortalized cells</i> | <i>Suppression of gene</i>            | <i>Ectopic overexpression of the gene</i>       |                                                                                             |                                                                                                                                                                                              |
| <i>FLJ14675</i>            | 84909                      | 9q22                           | ↑                      | ↓                         |                                       |                                                 |                                                                                             | 2002; Shelton et al., 1999; Suzuki et al., 2001; Untergasser et al., 2002; Zhang et al., 2003)<br>(Fridman et al., 2006)                                                                     |
| <i>Gelsolin</i>            | 2934                       | 9q33                           | ↑                      |                           |                                       |                                                 | Cytoskeleton                                                                                | (Fridman et al., 2006; Untergasser et al., 2002)                                                                                                                                             |
| <i>GUK1</i>                | 2987                       | 1q32-1q41                      | ↑                      |                           |                                       |                                                 |                                                                                             | (Zhang et al., 2003)                                                                                                                                                                         |
| <i>HEREGULIN</i>           | 3084                       | 8p12                           | ↑                      |                           |                                       |                                                 | MAP kinase                                                                                  | (Linskens et al., 1995)                                                                                                                                                                      |
| <i>HIC5</i>                | 7041                       | 16p11.2                        | ↑                      | ↓                         | Delays senescence                     | Senescence                                      | Cell adhesion                                                                               | (Shibanuma et al., 1997)                                                                                                                                                                     |
| <i>HPS5</i>                | 11234                      | 11p14                          | ↑                      | ↓                         |                                       |                                                 | Cytoskeleton                                                                                | (Fridman et al., 2006)                                                                                                                                                                       |
| <i>HSPA2</i>               | 3306                       | 14q24.1                        | ↑                      | ↓                         |                                       |                                                 |                                                                                             | (Fridman et al., 2006)                                                                                                                                                                       |
| <i>HTATIP2</i>             | 10553                      | 11p15.1                        | ↑                      | ↓                         | Immortalization                       |                                                 | Cell cycle<br>Oxidoreductase activity                                                       | (Fridman et al., 2006; Zhang et al., 2003)                                                                                                                                                   |
| <i>HTF (F3)</i>            | 2152                       | 1p22-p21                       | ↑                      |                           |                                       |                                                 |                                                                                             | (Linskens et al., 1995)                                                                                                                                                                      |
| <i>ID1</i>                 | 3397                       | 20q11                          | ↓                      |                           | Senescence                            | Immortalization                                 |                                                                                             | (Alani et al., 1999; Alani et al., 2001; Untergasser et al., 2002)                                                                                                                           |
| <i>IFI 16</i>              | 3428                       | 1q22                           | ↑                      | ↓                         | Extends life span                     | Senescence                                      | Interacts with p53 and pRB<br>IFN                                                           | (Xin et al., 2003; Xin et al., 2004)                                                                                                                                                         |
| <i>IFN-γ</i>               | 3458                       | 12q14                          | ↑                      |                           |                                       |                                                 | IFN                                                                                         | (Linskens et al., 1995)                                                                                                                                                                      |
| <i>IGFBP1</i>              | 3484                       | 7p13-7p12                      | ↑                      |                           |                                       |                                                 | IGF                                                                                         | (Fridman et al., 2006; Fridman et al., 2007)                                                                                                                                                 |
| <i>IGFBP2</i>              | 3485                       | 2q33-2q34                      | ↑                      | ↓                         |                                       |                                                 | IGF                                                                                         | (Fridman et al., 2006; Fridman et al., 2007; Schwarze et al., 2002; Shelton et al., 1999; Zhang et al., 2003)                                                                                |
| <i>IGFBP3</i>              | 3486                       | 7p13-7p12                      | ↑                      | ↓                         |                                       | Suppresses growth and inhibits colony formation | IGF<br>IFN                                                                                  | (Fridman et al., 2006; Fridman et al., 2007; Goldstein et al., 1991; Kang et al., 2003; Li et al., 2007; Murano et al., 1991; Schwarze et al., 2002; Suzuki et al., 2001; Yoon et al., 2004) |
| <i>IGFBP4</i>              | 3487                       | 7q12-7q21.1                    | ↑                      | ↓                         |                                       |                                                 | IGF<br>IFN                                                                                  | (Fridman et al., 2006; Fridman et al., 2007; Kang et al., 2003; Kulaeva et al., 2003; Suzuki et al., 2001)                                                                                   |
| <i>IGFBP5</i>              | 3488                       | 2q33-2q36                      | ↑                      | ↓                         | Partial reversal senescence phenotype | Senescence                                      | IGF                                                                                         | (Fridman et al., 2006; Fridman et al., 2007; Li et al., 2007; Linskens et al., 1995; Schwarze et al., 2002; Seok Kim et al., 2007; Shelton et al., 1999; Yoon et al., 2004)                  |
| <i>IGFBP6</i>              | 3489                       | 12q13                          | ↑                      | ↓                         |                                       |                                                 | IGF                                                                                         | (Chang et al., 2002; Fridman et al., 2006; Fridman et al., 2007; Kulaeva et al., 2003)                                                                                                       |
| <i>IGFBP<sup>r</sup>P1</i> | 3490                       | 4q12                           | ↑                      | ↓                         |                                       | Senescence                                      | Cell cycle                                                                                  | (Fridman et al., 2006; Fridman et al., 2007;                                                                                                                                                 |



**Pathways in Cellular Immortalization**  
AL Fridman and MA Tainsky

| Gene                                           | GeneID <sup>d</sup> | Chromosome <sup>b</sup> | Expression      |                    | Functional Studies  |                                    | Association with one of the six key senescence/immortalization pathways <sup>c</sup> | References                                                                                                         |
|------------------------------------------------|---------------------|-------------------------|-----------------|--------------------|---------------------|------------------------------------|--------------------------------------------------------------------------------------|--------------------------------------------------------------------------------------------------------------------|
|                                                |                     |                         | Senescent cells | Immortalized cells | Suppression of gene | Ectopic overexpression of the gene |                                                                                      |                                                                                                                    |
|                                                |                     |                         |                 |                    |                     |                                    | IGF                                                                                  | Lopez-Bermejo et al., 2000; Swisshelm et al., 1995; Wilson et al., 2002; Zhang et al., 2003)                       |
| <i>IGFBP2</i> ( <i>CTGF</i> ; <i>IGFBP8</i> )  | 1490                | 6q23.1                  | ↑               | ↓                  |                     |                                    | Cell adhesion<br>IGF                                                                 | (Fridman et al., 2006; Fridman et al., 2007; Kang et al., 2003; Lopez-Bermejo et al., 2000; Schwarze et al., 2002) |
| <i>IGFBP5</i> ( <i>HTRA1</i> ; <i>PRSS11</i> ) | 5654                | 10q26.3                 |                 | ↓                  |                     |                                    | IGF                                                                                  | (Fridman et al., 2006; Fridman et al., 2007)                                                                       |
| <i>IGFBP6</i> ( <i>ESM1</i> )                  | 11082               | 5q11.2                  | ↑               | ↑↓ <sup>d</sup>    |                     |                                    | Regulated by cytokines<br>IGF                                                        | (Fridman et al., 2006; Fridman et al., 2007)                                                                       |
| <i>IGFBP8</i> ( <i>WISP1</i> )                 | 8840                | 8q24.1-8q24.3           | ↓               | ↑                  |                     |                                    | Cell adhesion<br>IGF                                                                 | (Fridman et al., 2006; Fridman et al., 2007; Kulaeva et al., 2003)                                                 |
| <i>IGF1R</i>                                   | 3480                | 15q26.3                 |                 | ↑                  |                     |                                    | Cell cycle<br>IGF                                                                    | (Fridman et al., 2006; Fridman et al., 2007)                                                                       |
| <i>IGSF3</i>                                   | 3321                | 1p13                    | ↑               |                    |                     |                                    | Immune system                                                                        | (Zhang et al., 2003)                                                                                               |
| <i>IRF5</i>                                    | 3663                | 7q32                    | ↑               | ↓                  |                     | Senescence                         | IFN                                                                                  | (Li et al., 2008)                                                                                                  |
| <i>IRF7</i>                                    | 3665                | 11p15.5                 | ↑               | ↓                  |                     | Senescence                         | IFN                                                                                  | (Kulaeva et al., 2003; Li et al., 2008; Liang et al., 2002)                                                        |
| <i>ISG15</i>                                   | 9636                | 1p36.33                 | ↑               |                    |                     |                                    | IFN                                                                                  | (Zhang et al., 2003)                                                                                               |
| <i>KIAA1750</i>                                | 85453               | 8q22.1                  | ↑               | ↓                  |                     |                                    |                                                                                      | (Fridman et al., 2006)                                                                                             |
| <i>LAMININA</i>                                | 284217              | 18p11.31                | ↓               |                    |                     |                                    | Cell adhesion                                                                        | (Linskens et al., 1995)                                                                                            |
| <i>LDB2</i>                                    | 9079                | 4p16                    | ↓               | ↑                  |                     |                                    |                                                                                      | (Fridman et al., 2006)                                                                                             |
| <i>MAP1LC3B</i>                                | 81631               | 16q24.2                 | ↑               | ↓                  |                     |                                    | Cytoskeleton                                                                         | (Fridman et al., 2006)                                                                                             |
| <i>MDM2</i>                                    | 4193                | 12q14.3-12q15           | ↑               |                    |                     |                                    | Cell cycle                                                                           | (Schwarze et al., 2002)                                                                                            |
| <i>MKK3</i>                                    | 5606                | 17q11.2                 | ↑               | ↓                  |                     | Senescence                         | MAP kinase                                                                           | (Fridman et al., 2006; Wang et al., 2002)                                                                          |
| <i>MKK6</i>                                    | 5608                | 17q24.3                 |                 |                    |                     | Senescence                         | Cell cycle<br>MAP kinase                                                             | (Haq et al., 2002; Wang et al., 2002)                                                                              |
| <i>MMP1</i>                                    | 4312                | 11q22.3                 | ↑               |                    |                     |                                    |                                                                                      | (Kang et al., 2003)                                                                                                |
| <i>MORF4</i>                                   | 10934               | 4q33-4q34.1             |                 |                    |                     | Senescence                         |                                                                                      | (Bertram et al., 1999; Berube et al., 1998)                                                                        |
| <i>c-MYC</i>                                   | 4609                | 8q24.21                 |                 |                    |                     | Immortalization                    | Cell cycle                                                                           | (Bringold & Serrano, 2000; Gil et al., 2005)                                                                       |
| <i>NDN</i>                                     | 4692                | 15q11.2-15q12           | ↑               | ↓                  |                     |                                    | Cell cycle<br>Cytoskeleton                                                           | (Kulaeva et al., 2003)                                                                                             |
| <i>nm23-H2</i>                                 | 4831                | 17q21.3                 | ↑               |                    |                     |                                    | Cell cycle<br>Cell adhesion                                                          | (Lecka-Czernik et al., 1996)                                                                                       |
| <i>OPTN</i>                                    | 10133               | 10p13                   | ↑               | ↓                  |                     |                                    | IFN                                                                                  | (Fridman et al., 2006)                                                                                             |

**Pathways in Cellular Immortalization**  
AL Fridman and MA Tainsky

| <i>Gene</i>                    | <i>GeneID</i> <sup>a</sup> | <i>Chromosome</i> <sup>b</sup> | <i>Expression</i>      |                           | <i>Functional Studies</i>  |                                           | <i>Association with one of the six key senescence/immortalization pathways</i> <sup>c</sup> | <i>References</i>                                                                                                                                                                              |
|--------------------------------|----------------------------|--------------------------------|------------------------|---------------------------|----------------------------|-------------------------------------------|---------------------------------------------------------------------------------------------|------------------------------------------------------------------------------------------------------------------------------------------------------------------------------------------------|
|                                |                            |                                | <i>Senescent cells</i> | <i>Immortalized cells</i> | <i>Suppression of gene</i> | <i>Ectopic overexpression of the gene</i> |                                                                                             |                                                                                                                                                                                                |
| <i>Osteonectin</i>             | 6678                       | 5q31.3-5q32                    | ↑                      | ↓                         |                            |                                           | Cell cycle<br>Cytoskeleton                                                                  | (Kang et al., 2003; Lecka-Czernik et al., 1996; Murano et al., 1991; Schwarze et al., 2002)                                                                                                    |
| <i>p14<sup>ARF</sup></i>       | 1029                       | 9p21                           |                        |                           |                            |                                           | Senescence                                                                                  | (Sekaric et al., 2007; Shamanin & Androphy, 2004)                                                                                                                                              |
| <i>p15<sup>INK4b</sup></i>     | 1030                       | 9p21                           | ↑                      |                           |                            |                                           | Senescence                                                                                  | (Kang et al., 2003; Roninson, 2003)                                                                                                                                                            |
| <i>p16<sup>INK4a</sup></i>     | 1029                       | 9p21                           | ↑                      | ↓                         |                            |                                           | Senescence                                                                                  | (Kang et al., 2003; Schwarze et al., 2002; Tsutsui et al., 2002; Vogt et al., 1998)                                                                                                            |
| <i>p19<sup>INK4d</sup></i>     | 1032                       | 19p13                          | ↑                      |                           |                            |                                           | Senescence                                                                                  | (Kang et al., 2003)                                                                                                                                                                            |
| <i>p21<sup>CIP1/WAF1</sup></i> | 1026                       | 6p21.2                         | ↑                      | ↓                         |                            |                                           | Senescence                                                                                  | (Chang et al., 2002; Schwarze et al., 2002; Suzuki et al., 2001; Vogt et al., 1998; Wells et al., 2003)                                                                                        |
| <i>p33ING1</i>                 | 3621                       | 13q34                          | ↑                      |                           | Extends life span          |                                           | Senescence                                                                                  | (Berube et al., 1998; Garkavtsev & Riabowol, 1997; Goeman et al., 2005)                                                                                                                        |
| <i>p38HOG</i>                  | 1432                       | 6p21.3-6p21.2                  |                        |                           |                            |                                           | Senescence                                                                                  | (Haq et al., 2002; Wang et al., 2002)                                                                                                                                                          |
| <i>p53</i>                     | 7157                       | 17p13.1                        | ↑                      | ↓                         | Extends life span          |                                           | Senescence                                                                                  | (Bischoff et al., 1990; Bischoff et al., 1991; Fridman et al., 2006; Harvey et al., 1993; Rogan et al., 1995; Roninson, 2003; Serrano et al., 1997; Sugrue et al., 1997; Tsutsui et al., 1997) |
| <i>p57</i>                     | 1028                       | 11p15.5                        | ↑                      |                           |                            |                                           | Senescence                                                                                  | (Kang et al., 2003; Roninson, 2003; Wells et al., 2003)                                                                                                                                        |
| <i>p130</i>                    | 5934                       | 16q12.2                        | ↑                      |                           |                            |                                           | Senescence                                                                                  | (Wells et al., 2003)                                                                                                                                                                           |
| <i>PAI-1</i>                   | 5054                       | 7q21.3-7q22                    | ↑                      | ↓                         | Senescence                 | Immortalization                           | Cell cycle<br>Cytoskeleton                                                                  | (Kortlever et al., 2006; Lecka-Czernik et al., 1996; Li et al., 2007; Murano et al., 1991; Shelton et al., 1999; Suzuki et al., 2001; Untergasser et al., 2002)                                |
| <i>PEA15</i>                   | 8682                       | 1q21.1                         | ↑                      |                           |                            |                                           | Cytoskeleton<br>MAP kinase                                                                  | (Zhang et al., 2003)                                                                                                                                                                           |
| <i>pRB</i>                     | 5925                       | 13q14.2                        |                        | ↓                         | Immortalization            |                                           | Senescence                                                                                  | (Berube et al., 1998; Roninson, 2003)                                                                                                                                                          |
| <i>RAB13</i>                   | 5872                       | 1q21.2                         | ↑                      |                           |                            |                                           | Cell adhesion                                                                               | (Wells et al., 2003)                                                                                                                                                                           |
| <i>RAB2L</i>                   | 5863                       | 6p21.3                         | ↑                      |                           |                            |                                           |                                                                                             | (Wells et al., 2003)                                                                                                                                                                           |
| <i>RAB31</i>                   | 11031                      | 18p11.3                        | ↑                      |                           |                            |                                           |                                                                                             | (Wells et al., 2003)                                                                                                                                                                           |
| <i>RAB5B</i>                   | 5869                       | 12q13                          | ↑                      |                           |                            |                                           |                                                                                             | (Wells et al., 2003)                                                                                                                                                                           |
| <i>RABGGTA</i>                 | 5875                       | 14q11.2                        | ↑                      |                           |                            |                                           |                                                                                             | (Wells et al., 2003)                                                                                                                                                                           |
| <i>RAC1</i>                    | 5879                       | 7p22                           | ↑                      |                           |                            |                                           | Cell adhesion<br>Cell cycle                                                                 | (Untergasser et al., 2002)                                                                                                                                                                     |

**Pathways in Cellular Immortalization**  
AL Fridman and MA Tainsky

| Gene                    | GeneID <sup>a</sup> | Chromosome <sup>b</sup> | Expression      |                    | Functional Studies  |                                                    | Association with one of the six key senescence/immortalization pathways <sup>c</sup> | References                                                                            |
|-------------------------|---------------------|-------------------------|-----------------|--------------------|---------------------|----------------------------------------------------|--------------------------------------------------------------------------------------|---------------------------------------------------------------------------------------|
|                         |                     |                         | Senescent cells | Immortalized cells | Suppression of gene | Ectopic overexpression of the gene                 |                                                                                      |                                                                                       |
|                         |                     |                         |                 |                    |                     |                                                    | Cytoskeleton<br>Inflammatory response                                                |                                                                                       |
| <i>RhoB</i>             | 388                 | 2p24                    | ↑               |                    |                     |                                                    | Cell cycle<br>Cell adhesion                                                          | (Schwarze et al., 2002)                                                               |
| <i>RAS (H-ras V12)</i>  | 3265                | 11p15.5                 |                 |                    |                     | Senescence (p16 <sup>INKa</sup> and p53 dependent) | Cytoskeleton<br>MAP kinase                                                           | (Serrano et al., 1997)                                                                |
| <i>RRAS</i>             | 6237                | 19q13.3-qter            | ↑               |                    |                     |                                                    | Cytoskeleton<br>MAP kinase                                                           | (Zhang et al., 2003)                                                                  |
| <i>S100A11</i>          | 6282                | 1q21                    | ↑               | ↓                  |                     |                                                    | Cell cycle<br>Cytoskeleton                                                           | (Sakaguchi et al., 2000; Sakaguchi et al., 2001; Zhang et al., 2003)                  |
| <i>SERPINB2</i>         | 5055                | 18q21.3                 | ↑               | ↓                  |                     |                                                    | Interacts with pRB<br>IFN                                                            | (Fridman et al., 2006; Liang et al., 2002; Linskens et al., 1995; Zhang et al., 2003) |
| <i>SMURF2</i>           | 64750               | 17q22-17q23             | ↑               |                    |                     | Senescence                                         | Cell cycle                                                                           | (Zhang & Cohen, 2004)                                                                 |
| <i>SOD</i>              | 6647                | 21q22.11                | ↑               |                    |                     |                                                    | Oxidoreductase activity                                                              | (Linskens et al., 1995)                                                               |
| <i>Sphingomyelinase</i> | 6609                | 11p15.4-11p15.1         | ↑               |                    |                     |                                                    |                                                                                      | (Lecka-Czernik et al., 1996)                                                          |
| <i>STAT1</i>            | 6772                | 2q32.2                  | ↑               | ↓                  |                     | Insufficient to growth arrest or senesce cells     | IFN                                                                                  | (Kulaeva et al., 2003; Liang et al., 2002; Tang et al., 2006; Zhang et al., 2003)     |
| <i>hTERT</i>            | 7015                | 5p15.33                 |                 | ↑                  |                     | Extends life span                                  |                                                                                      | (Bodnar et al., 1998; Kulaeva et al., 2003)                                           |
| <i>TES</i>              | 26136               | 7q31.2                  | ↑               | ↓                  |                     |                                                    | Cytoskeleton                                                                         | (Fridman et al., 2006; Kulaeva et al., 2003)                                          |
| <i>TFAP2A</i>           | 7020                | 6p24                    | ↑               |                    |                     |                                                    |                                                                                      | (Liang et al., 2002; Zhang et al., 2003)                                              |
| <i>Thrombospondin</i>   | 7057                | 15q15                   | ↑               |                    |                     |                                                    | Cell adhesion                                                                        | (Lecka-Czernik et al., 1996; Murano et al., 1991)                                     |
| <i>TNFAIP2</i>          | 7127                | 14q32                   | ↑               | ↓                  |                     |                                                    |                                                                                      | (Fridman et al., 2006)                                                                |
| <i>TNFAIP3</i>          | 7128                | 6q23                    | ↑               |                    |                     |                                                    | Immune                                                                               | (Liang et al., 2002; Zhang et al., 2003)                                              |
| <i>Vimentin</i>         | 7431                | 10p13                   | ↑               | ↓                  |                     |                                                    | Cytoskeleton                                                                         | (Kaneko et al., 1995; Satoh et al., 1994; Untergasser et al., 2002)                   |
| <i>αB-crystallin</i>    | 1410                | 11q22.3-11q23.1         | ↑               |                    |                     |                                                    |                                                                                      | (Murano et al., 1991)                                                                 |
| <i>80K-L</i>            | 4082                | 6q22.2                  | ↓               |                    |                     |                                                    | Cytoskeleton                                                                         | (Linskens et al., 1995)                                                               |

Abbreviations: IFN, interferon; IGF, insulin growth factor

<sup>a</sup>GeneID: <http://www.ncbi.nlm.nih.gov/sites/entrez>

<sup>b</sup>Chromosome location obtained from NCBI GeneID record

<sup>c</sup>Based on information from the literature and from NCBI (<http://www.ncbi.nlm.nih.gov/sites/entrez>)

<sup>d</sup>Expression is cell line dependent

## References

- Alani RM, Hasskarl J, Grace M, Hernandez MC, Israel MA and Munger K. (1999). Immortalization of primary human keratinocytes by the helix-loop-helix protein, Id-1. *Proc Natl Acad Sci U S A*, **96**, 9637-41.
- Alani RM, Young AZ and Shifflett CB. (2001). Id1 regulation of cellular senescence through transcriptional repression of p16/Ink4a. *Proc Natl Acad Sci U S A*, **98**, 7812-6.
- Bertram MJ, Berube NG, Hang-Swanson X, Ran Q, Leung JK, Bryce S, et al. (1999). Identification of a gene that reverses the immortal phenotype of a subset of cells and is a member of a novel family of transcription factor-like genes. *Mol Cell Biol*, **19**, 1479-85.
- Berube NG, Smith JR and Pereira-Smith OM. (1998). The genetics of cellular senescence. *Am J Hum Genet*, **62**, 1015-9.
- Bischoff FZ, Yim SO, Pathak S, Grant G, Siciliano MJ, Giovanella BC, et al. (1990). Spontaneous abnormalities in normal fibroblasts from patients with Li-Fraumeni cancer syndrome: aneuploidy and immortalization. *Cancer Res*, **50**, 7979-84.
- Bischoff FZ, Strong LC, Yim SO, Pratt DR, Siciliano MJ, Giovanella BC, et al. (1991). Tumorigenic transformation of spontaneously immortalized fibroblasts from patients with a familial cancer syndrome. *Oncogene*, **6**, 183-6.
- Bodnar AG, Ouellette M, Frolkis M, Holt SE, Chiu CP, Morin GB, et al. (1998). Extension of life-span by introduction of telomerase into normal human cells. *Science*, **279**, 349-52.
- Bringold F and Serrano M. (2000). Tumor suppressors and oncogenes in cellular senescence. *Exp Gerontol*, **35**, 317-29.
- Chang BD, Swift ME, Shen M, Fang J, Broude EV and Roninson IB. (2002). Molecular determinants of terminal growth arrest induced in tumor cells by a chemotherapeutic agent. *Proc Natl Acad Sci U S A*, **99**, 389-94.
- Dairkee SH, Nicolau M, Sayeed A, Champion S, Ji Y, Moore DH, et al. (2007). Oxidative stress pathways highlighted in tumor cell immortalization: association with breast cancer outcome. *Oncogene*, **26**, 6269-79.
- Di Bacco A and Gill G. (2003). The secreted glycoprotein CREG inhibits cell growth dependent on the mannose-6-phosphate/insulin-like growth factor II receptor. *Oncogene*, **22**, 5436-45.
- Fridman AL, Tang L, Kulaeva OI, Ye B, Li Q, Nahhas F, et al. (2006). Expression profiling identifies three pathways altered in cellular immortalization: interferon, cell cycle, and cytoskeleton. *J Gerontol A Biol Sci Med Sci*, **61**, 879-89.
- Fridman AL, Rosati R, Li Q and Tainsky MA. (2007). Epigenetic and functional analysis of IGFBP3 and IGFBP1 in cellular immortalization. *Biochem Biophys Res Commun*, **357**, 785-91.
- Garkavtsev I and Riabowol K. (1997). Extension of the replicative life span of human diploid fibroblasts by inhibition of the p33ING1 candidate tumor suppressor. *Mol Cell Biol*, **17**, 2014-9.

- Gil J, Kerai P, Leonart M, Bernard D, Cigudosa JC, Peters G, et al. (2005). Immortalization of primary human prostate epithelial cells by c-Myc. *Cancer Res*, **65**, 2179-85.
- Goeman F, Thormeyer D, Abad M, Serrano M, Schmidt O, Palmero I, et al. (2005). Growth inhibition by the tumor suppressor p33ING1 in immortalized and primary cells: involvement of two silencing domains and effect of Ras. *Mol Cell Biol*, **25**, 422-31.
- Goldstein S, Moerman EJ, Jones RA and Baxter RC. (1991). Insulin-like growth factor binding protein 3 accumulates to high levels in culture medium of senescent and quiescent human fibroblasts. *Proc Natl Acad Sci U S A*, **88**, 9680-4.
- Haq R, Brenton JD, Takahashi M, Finan D, Finkielsztejn A, Damaraju S, et al. (2002). Constitutive p38HOG mitogen-activated protein kinase activation induces permanent cell cycle arrest and senescence. *Cancer Res*, **62**, 5076-82.
- Harvey M, Sands AT, Weiss RS, Hegi ME, Wiseman RW, Pantazis P, et al. (1993). In vitro growth characteristics of embryo fibroblasts isolated from p53-deficient mice. *Oncogene*, **8**, 2457-67.
- Itahana K, Zou Y, Itahana Y, Martinez JL, Beausejour C, Jacobs JJ, et al. (2003). Control of the replicative life span of human fibroblasts by p16 and the polycomb protein Bmi-1. *Mol Cell Biol*, **23**, 389-401.
- Kaneko S, Satoh Y, Ikemura K, Konishi T, Ohji T, Karasaki Y, et al. (1995). Alterations of expression of the cytoskeleton after immortalization of human fibroblasts. *Cell Struct Funct*, **20**, 107-15.
- Kang MK, Kameta A, Shin KH, Baluda MA, Kim HR and Park NH. (2003). Senescence-associated genes in normal human oral keratinocytes. *Exp Cell Res*, **287**, 272-81.
- Kortlever RM, Higgins PJ and Bernards R. (2006). Plasminogen activator inhibitor-1 is a critical downstream target of p53 in the induction of replicative senescence. *Nat Cell Biol*, **8**, 877-84.
- Kulaeva OI, Draghici S, Tang L, Kraniak JM, Land SJ and Tainsky MA. (2003). Epigenetic silencing of multiple interferon pathway genes after cellular immortalization. *Oncogene*, **22**, 4118-27.
- Lecka-Czernik B, Moerman EJ, Jones RA and Goldstein S. (1996). Identification of gene sequences overexpressed in senescent and Werner syndrome human fibroblasts. *Exp Gerontol*, **31**, 159-74.
- Li Q, Tang L, Roberts PC, Kraniak JM, Fridman AL, Kulaeva OI, et al. (2008). Interferon Regulatory Factors IRF5 and IRF7 Inhibit Growth and Induce Senescence in Immortal Li-Fraumeni Fibroblasts. *Mol Cancer Res*, **6**, 770-84.
- Li Y, Pan J, Li JL, Lee JH, Tunkey C, Saraf K, et al. (2007). Transcriptional changes associated with breast cancer occur as normal human mammary epithelial cells overcome senescence barriers and become immortalized. *Mol Cancer*, **6**, 7.
- Liang G, Gonzales FA, Jones PA, Orntoft TF and Thykjaer T. (2002). Analysis of gene induction in human fibroblasts and bladder cancer cells exposed to the methylation inhibitor 5-aza-2'-deoxycytidine. *Cancer Res*, **62**, 961-6.

- Linskens MH, Feng J, Andrews WH, Enlow BE, Saati SM, Tonkin LA, et al. (1995). Cataloging altered gene expression in young and senescent cells using enhanced differential display. *Nucleic Acids Res*, **23**, 3244-51.
- Lopez-Bermejo A, Buckway CK, Devi GR, Hwa V, Plymate SR, Oh Y, et al. (2000). Characterization of insulin-like growth factor-binding protein-related proteins (IGFBP-rPs) 1, 2, and 3 in human prostate epithelial cells: potential roles for IGFBP-rP1 and 2 in senescence of the prostatic epithelium. *Endocrinology*, **141**, 4072-80.
- Martin ME, Milne TA, Bloyer S, Galoian K, Shen W, Gibbs D, et al. (2003). Dimerization of MLL fusion proteins immortalizes hematopoietic cells. *Cancer Cell*, **4**, 197-207.
- Murano S, Thweatt R, Shmookler Reis RJ, Jones RA, Moerman EJ and Goldstein S. (1991). Diverse gene sequences are overexpressed in werner syndrome fibroblasts undergoing premature replicative senescence. *Mol Cell Biol*, **11**, 3905-14.
- Ozawa S, Kato Y, Komori R, Maehata Y, Kubota E and Hata R. (2006). BRAK/CXCL14 expression suppresses tumor growth in vivo in human oral carcinoma cells. *Biochem Biophys Res Commun*, **348**, 406-12.
- Rogan EM, Bryan TM, Hukku B, Maclean K, Chang AC, Moy EL, et al. (1995). Alterations in p53 and p16INK4 expression and telomere length during spontaneous immortalization of Li-Fraumeni syndrome fibroblasts. *Mol Cell Biol*, **15**, 4745-53.
- Roninson IB. (2003). Tumor cell senescence in cancer treatment. *Cancer Res*, **63**, 2705-15.
- Sakaguchi M, Miyazaki M, Inoue Y, Tsuji T, Kouchi H, Tanaka T, et al. (2000). Relationship between contact inhibition and intranuclear S100C of normal human fibroblasts. *J Cell Biol*, **149**, 1193-206.
- Sakaguchi M, Miyazaki M, Kondo T and Namba M. (2001). Up-regulation of S100C in normal human fibroblasts in the process of aging in vitro. *Exp Gerontol*, **36**, 1317-25.
- Satoh Y, Kashimura M, Kaneko S, Karasaki Y, Higashi K and Gotoh S. (1994). Cloning of cDNAs with possible association with senescence and immortalization of human cells. *Mutat Res*, **316**, 25-36.
- Schwarze SR, DePrimo SE, Grabert LM, Fu VX, Brooks JD and Jarrard DF. (2002). Novel pathways associated with bypassing cellular senescence in human prostate epithelial cells. *J Biol Chem*, **277**, 14877-83.
- Sekaric P, Shamanin VA, Luo J and Androphy EJ. (2007). hAda3 regulates p14ARF-induced p53 acetylation and senescence. *Oncogene*, **26**, 6261-8.
- Seok Kim K, Bae Seu Y, Baek SH, Jin Kim M, Jun Kim K, Hye Kim J, et al. (2007). Induction of Cellular Senescence by Insulin-like Growth Factor Binding Protein-5 through a p53-dependent Mechanism. *Mol Biol Cell*, **18**, 4543-52.
- Serrano M, Lin AW, McCurrach ME, Beach D and Lowe SW. (1997). Oncogenic ras provokes premature cell senescence associated with accumulation of p53 and p16INK4a. *Cell*, **88**, 593-602.

- Shamanin VA and Androphy EJ. (2004). Immortalization of human mammary epithelial cells is associated with inactivation of the p14ARF-p53 pathway. *Mol Cell Biol*, **24**, 2144-52.
- Shelton DN, Chang E, Whittier PS, Choi D and Funk WD. (1999). Microarray analysis of replicative senescence. *Curr Biol*, **9**, 939-45.
- Shibanuma M, Mochizuki E, Maniwa R, Mashimo J, Nishiya N, Imai S, et al. (1997). Induction of senescence-like phenotypes by forced expression of hic-5, which encodes a novel LIM motif protein, in immortalized human fibroblasts. *Mol Cell Biol*, **17**, 1224-35.
- Sugrue MM, Shin DY, Lee SW and Aaronson SA. (1997). Wild-type p53 triggers a rapid senescence program in human tumor cells lacking functional p53. *Proc Natl Acad Sci U S A*, **94**, 9648-53.
- Suzuki T, Minagawa S, Michishita E, Ogino H, Fujii M, Mitsui Y, et al. (2001). Induction of senescence-associated genes by 5-bromodeoxyuridine in HeLa cells. *Exp Gerontol*, **36**, 465-74.
- Swisshelm K, Ryan K, Tsuchiya K and Sager R. (1995). Enhanced expression of an insulin growth factor-like binding protein (mac25) in senescent human mammary epithelial cells and induced expression with retinoic acid. *Proc Natl Acad Sci U S A*, **92**, 4472-6.
- Tandle AT, Mazzanti C, Alexander HR, Roberts DD and Libutti SK. (2005). Endothelial monocyte activating polypeptide-II induced gene expression changes in endothelial cells. *Cytokine*, **30**, 347-58.
- Tang L, Roberts PC, Kraniak JM, Li Q and Tainsky MA. (2006). Stat1 expression is not sufficient to regulate the interferon signaling pathway in cellular immortalization. *J Interferon Cytokine Res*, **26**, 14-26.
- Tsutsui T, Tanaka Y, Matsudo Y, Hasegawa K, Fujino T, Kodama S, et al. (1997). Extended lifespan and immortalization of human fibroblasts induced by X-ray irradiation. *Mol Carcinog*, **18**, 7-18.
- Tsutsui T, Kumakura S, Yamamoto A, Kanai H, Tamura Y, Kato T, et al. (2002). Association of p16(INK4a) and pRb inactivation with immortalization of human cells. *Carcinogenesis*, **23**, 2111-7.
- Untergasser G, Koch HB, Menssen A and Hermeking H. (2002). Characterization of epithelial senescence by serial analysis of gene expression: identification of genes potentially involved in prostate cancer. *Cancer Res*, **62**, 6255-62.
- Vogt M, Haggblom C, Yeargin J, Christiansen-Weber T and Haas M. (1998). Independent induction of senescence by p16INK4a and p21CIP1 in spontaneously immortalized human fibroblasts. *Cell Growth Differ*, **9**, 139-46.
- Wang W, Chen JX, Liao R, Deng Q, Zhou JJ, Huang S, et al. (2002). Sequential activation of the MEK-extracellular signal-regulated kinase and MKK3/6-p38 mitogen-activated protein kinase pathways mediates oncogenic ras-induced premature senescence. *Mol Cell Biol*, **22**, 3389-403.
- Wells SI, Aronow BJ, Wise TM, Williams SS, Couget JA and Howley PM. (2003). Transcriptome signature of irreversible senescence in human papillomavirus-positive cervical cancer cells. *Proc Natl Acad Sci U S A*, **100**, 7093-8.

- Wilson HM, Birnbaum RS, Poot M, Quinn LS and Swisshelm K. (2002). Insulin-like growth factor binding protein-related protein 1 inhibits proliferation of MCF-7 breast cancer cells via a senescence-like mechanism. *Cell Growth Differ*, **13**, 205-13.
- Xin H, Curry J, Johnstone RW, Nickoloff BJ and Choubey D. (2003). Role of IFI 16, a member of the interferon-inducible p200-protein family, in prostate epithelial cellular senescence. *Oncogene*, **22**, 4831-40.
- Xin H, Pereira-Smith OM and Choubey D. (2004). Role of IFI 16 in cellular senescence of human fibroblasts. *Oncogene*, **23**, 6209-17.
- Yoon IK, Kim HK, Kim YK, Song IH, Kim W, Kim S, et al. (2004). Exploration of replicative senescence-associated genes in human dermal fibroblasts by cDNA microarray technology. *Exp Gerontol*, **39**, 1369-78.
- Zhang H, Pan KH and Cohen SN. (2003). Senescence-specific gene expression fingerprints reveal cell-type-dependent physical clustering of up-regulated chromosomal loci. *Proc Natl Acad Sci U S A*, **100**, 3251-6.
- Zhang H and Cohen SN. (2004). Smurf2 up-regulation activates telomere-dependent senescence. *Genes Dev*, **18**, 3028-40.
